# Supplementary material for: Workplace Violence in a Large Urban Emergency Department
Source: PubMed Central journal article supplement (PMC11539014; doi:10.1001/jamanetworkopen.2024.43160), 2024-11-05
Supplement: jamanetwopen-e2443160-s002.pdf [file jamanetwopen-e2443160-s002.pdf]

## **Data Sharing Statement**

Doehring. Workplace Violence in a Large Urban Emergency Department. *JAMA Netw Open*.  
Published November 05, 2024. doi:10.1001/jamanetworkopen.2024.43160

### **Data**

**Data available:** No
